# Supplementary material for: Dual functionality of tungsten oxide-doped magnesium oxide nanoparticles for organic dye adsorption and antimicrobial activity
Source: Royal Society of Chemistry journal article supplement (doi:10.1039/d6ra02662a), 2026-05-26
Supplement: d6ra02662a1.pdf [file d6ra02662a1.pdf]

Supplementary Information

## **Dual-functionality of tungsten oxide doped-Magnesium oxide nanoparticles for organic dyes adsorption and antimicrobial activity**

Amina Toumi<sup>1</sup>, Habiba A. Hossni<sup>2</sup>, Shahira H. EL-Moslamy<sup>3</sup>, Heba Y. Zahran<sup>4</sup>, V. Ganesh<sup>4</sup>,  
Mohammad Abohassan<sup>5</sup>, Saleh M. Matar<sup>6</sup>, Elbadawy A. Kamoun<sup>7\*</sup>, Ibrahim S. Yahia<sup>4\*</sup>

<sup>1</sup>*Department of Health and Laboratory sciences, College of Medical and Health Sciences, Liwa University, Abu Dhabi, P.O. Box 41009, United Arab Emirates.*

<sup>2</sup>*Nanotechnology Section, Egyptian Company for Carbon Materials, El-Sheraton/El-Nozha, Cairo 11757, Egypt.*

<sup>3</sup>*Bioprocess Development Department (BID), Genetic Engineering and Biotechnology Research Institute (GEBRI), City of Scientific Research and Technological Applications (SRTA-city), New Borg El-Arab City, Alexandria 21934, Egypt.*

<sup>4</sup>*Laboratory of Nano-Smart Materials for Science and Technology (LNSMST), Department of Physics, Faculty of Science, King Khalid University, P.O. Box 9004, Abha, Saudi Arabia.*

<sup>5</sup>*Department of Clinical Laboratory Sciences, College of Applied Medical Sciences, King Khalid University, Abha, Saudi Arabia.*

<sup>6</sup>*Department of Chemical Engineering, College of Engineering and Computer Sciences, Jazan University, Jazan, Saudi Arabia.*

<sup>7</sup>*Department of Chemistry, College of Science, King Faisal University, Al-Ahsa 31982, Saudi Arabia.*

*\*Corresponding authors: E-mail addresses: [ekamoun@kfu.edu.sa](mailto:ekamoun@kfu.edu.sa), [badawykamoun@yahoo.com](mailto:badawykamoun@yahoo.com) (E.A. Kamoun) Tel: +201283320302, [dr\\_isyahia@yahoo.com](mailto:dr_isyahia@yahoo.com) (I.S. Yahia).*

Supplementary Information

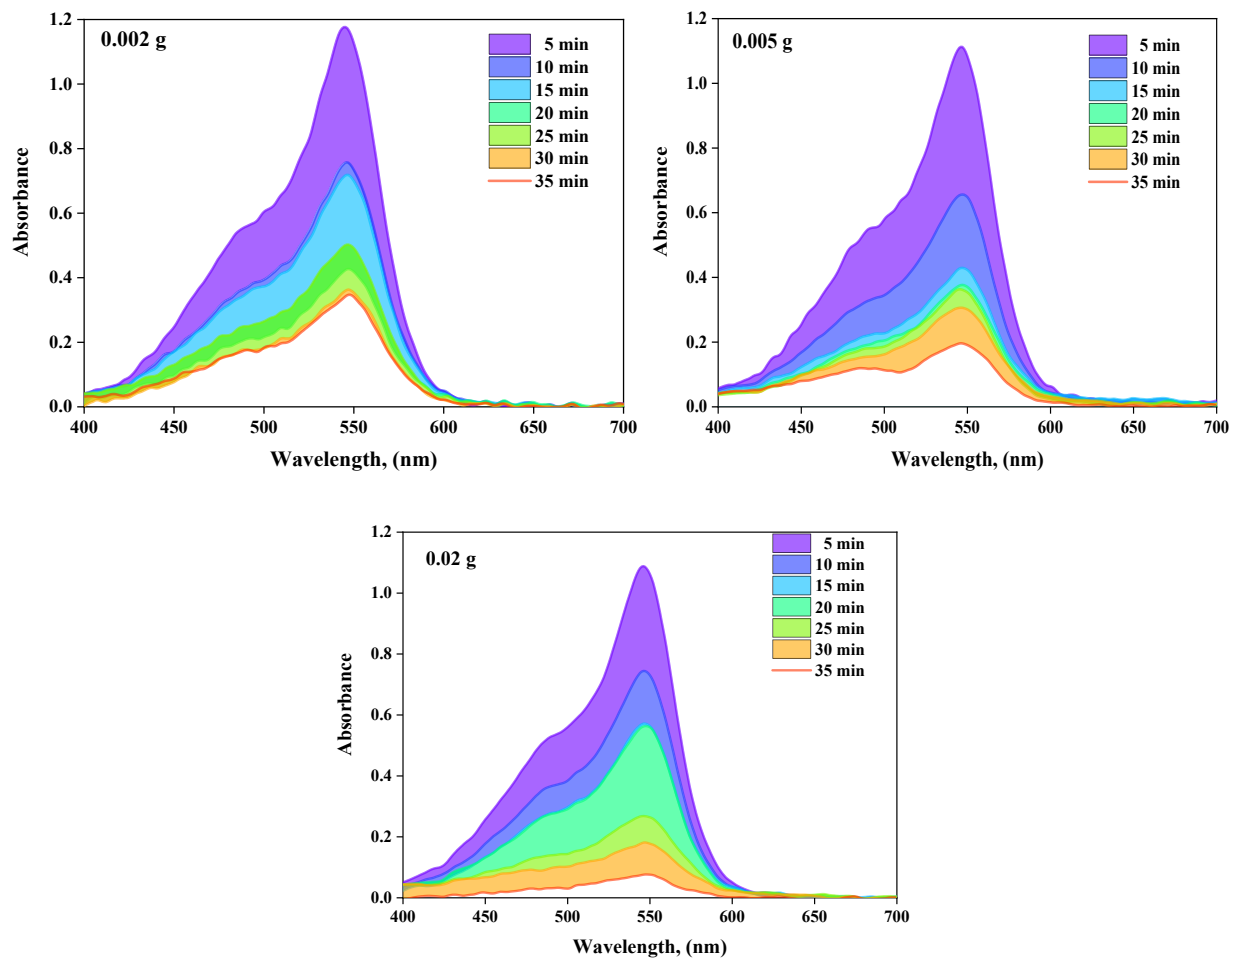

**Fig. S1** UV-Vis spectra of TW4 adsorption with various doses of BF dye.

Supplementary Information

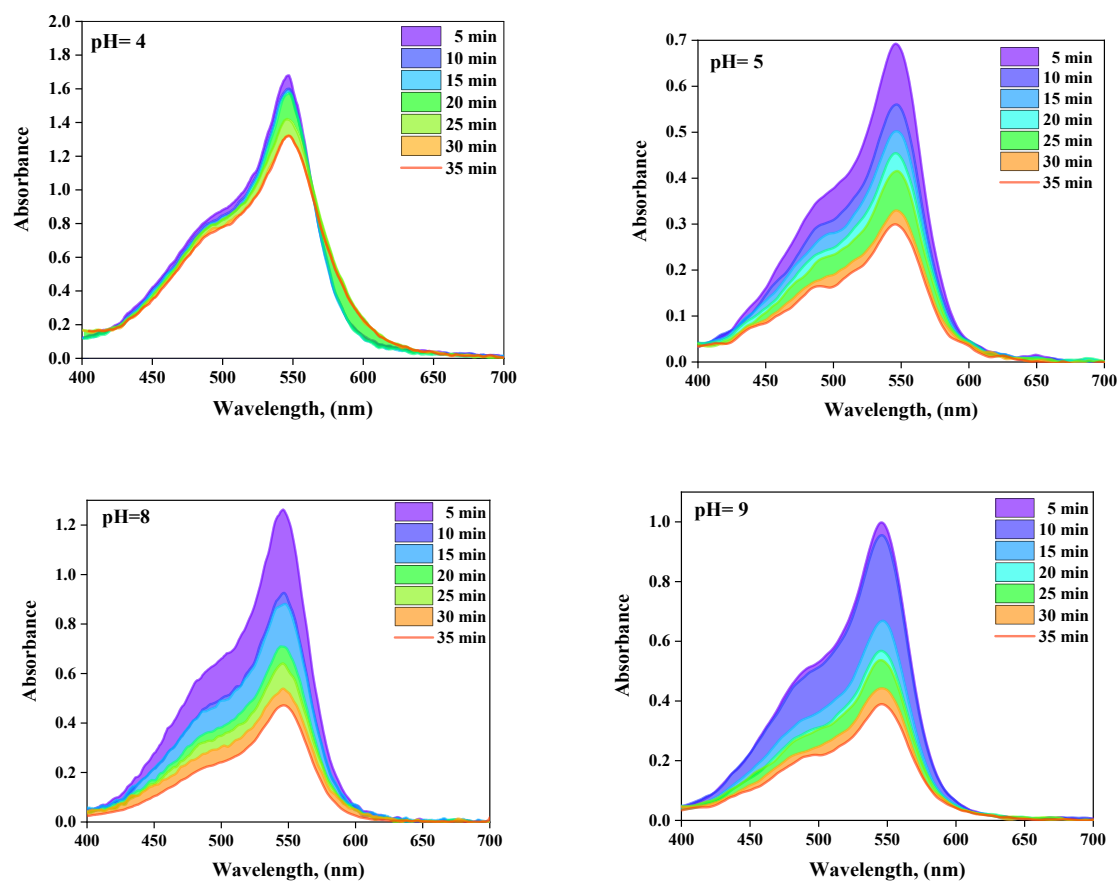

Fig. S2 UV-Vis spectra of TW4 adsorption with different pH values of BF dye.

Supplementary Information

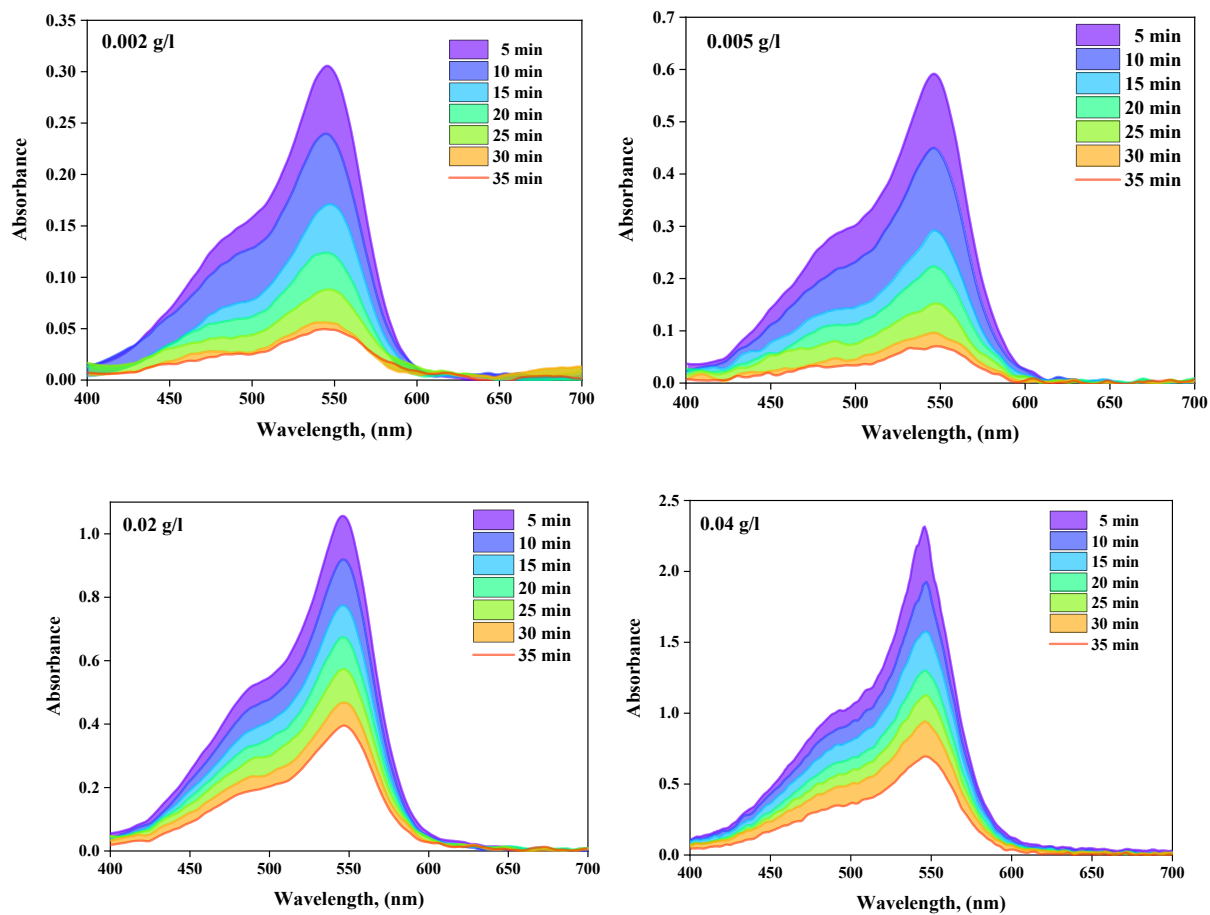

Fig. S3 UV-Vis spectra of TW4 adsorption with various dye concentrations of BF dye.
